# Supplementary material for: Diagnostic Accuracy of miRNA to Identify Colorectal cancer: A Systematic Review and Meta-Analysis
Source: Research Square preprint supplement (doi:10.21203/rs.3.rs-5278615/v1), 2024-10-29
Supplement: Supplementary file 1 [file 51dec584eb444c111d238288.docx]

**Table 3.** Possible sources of heterogeneity of covariants in the meta-regression analysis.

|  | **Sensivity applied** | | |
| --- | --- | --- | --- |
|  | **Coef** | **P** | **95% CI** |
| Year of publication | -0.006 | 0.618 | -0.033~-0.020 |
| Home or abroad | -0.027 | 0.592 | -0.077~-0.131 |
| Sample size | -0.000 | 0.663 | -0.000~0.000 |
| Serum or other | 0.008 | 0.905 | 0.123~0.138 |
|  | **DOR applied** | | |
|  | **Coef** | **P** | **95% CI** |
| Year of publication | 0.076 | 0.557 | -0.190~0.341 |
| Home or abroad | 0.776 | 0.127 | -0.243~1.794 |
| Sample size | -0.000 | 0.775 | -0.001~0.001 |
| Serum or other | -0.117 | 0.849 | -1.392~1.158 |

**Notes**：Coef, coefficent; CI, confidence interval; DOR, diagnostic odds ratio.
